# Supplementary material
Source: PubMed Central journal article supplement (PMC3697328)
Supplement: AAC.00220-13_zac999101956so1.pdf [file AAC.00220-13_zac999101956so1.pdf]

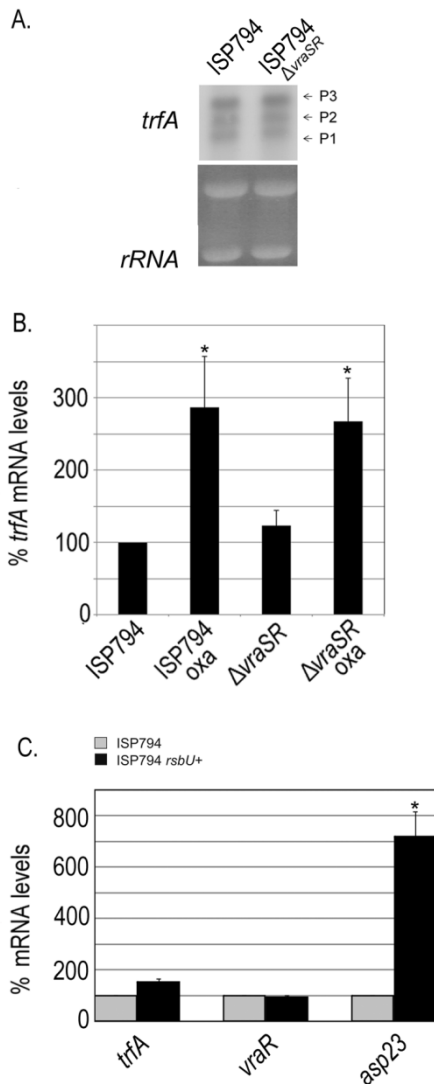

**FIG. S1. Effect of *VraR* and  $\sigma^B$  transcriptional regulators on *trfA* transcription.** **A)** Northern blot analysis of *trfA* transcripts in ISP794 and ISP794 $\Delta$ *vraSR* strains, using a radiolabeled  $^{32}$ P RNA *trfA*-specific probe. Arrows indicate the three different *trfA* transcripts as described in Fig 4. **B)** Effect of *vraSR* mutation on oxacillin-dependent *trfA* induction. Steady-state levels of *trfA* transcripts were determined by qRT-PCR and normalized to 16S rRNA, in strains ISP794 and ISP794 $\Delta$ *vraSR* in the presence or absence of 1  $\mu$ g/ml oxacillin (*oxa*). Values represent the mean  $\pm$  SEM of at least three independent experiments. (\*) Represents results significantly different (Student's two tailed *t*-test,  $p < 0.05$ ) compared with ISP794. **C)** Steady-state levels of *trfA*, *vraR* and *asp23* transcripts were determined by qRT-PCR and normalized to 16S rRNA, in strains ISP794 and ISP794 (*rsbU*<sup>+</sup>). Values represent the mean  $\pm$  SEM of at least three independent experiments.

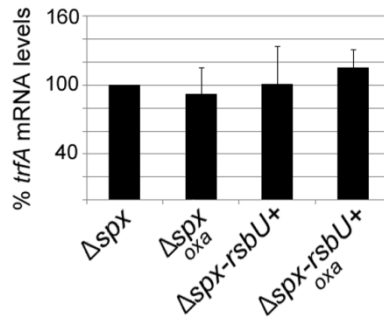

**FIG. S2. Effect of *rsbU*<sup>+</sup> restoration on *spx*-dependent *trfA* transcription.** Steady-state levels of *trfA* transcripts were determined by qRT-PCR and normalized to 16S rRNA. The mRNA levels of mutant Δ*spx* were compared to Δ*spx-rsbU*<sup>+</sup> in the presence or absence of oxacillin addition. Oxacillin induction of *trfA* transcription in wild-type strain was used as positive control for cell-wall stress (data not shown). Values represent the mean ± SEM of three independent experiments.

TABLE S1. Oligonucleotide PCR primers used in this study.

| Gene/Mutant/Protein             | Primer                        | Primer sequence (5'-3') <sup>1</sup>           |
|---------------------------------|-------------------------------|------------------------------------------------|
| TrfA Northern probe             | <i>Kpn1-trfA</i>              | CGGGTACCAAGGAGGAACAATCATGAGAATAGAACGAGTAGATGAT |
|                                 | <i>Pst1-trfA</i>              | AAAACTGCAGTATCGTTATTCAGTTGTCTCTGG              |
| 5'RACE                          | <i>trfA</i> -Pst1             | AAAACTGCAGTTATTCAGTTGTCTCTGGAAAA               |
|                                 | <i>trfA</i> -nested           | GATTTAGAAATTGTGACTTCGACACCTTTTTC               |
| TrfA-intein recombinant protein | <i>Kpn-Nde1 trfA</i> E09      | GGGGTACCCATATGAGAATAGAACGAGTAGATGATACAACCTG    |
|                                 | <i>HindIII-BamH1 trfA</i> E10 | GCCCAAGCTTGGATCCTTATTCAGTTGTCTCTGGAAAAATAACC   |
| qRT-PCR probes and primers      | <i>trfA</i> -102T FAM-TAMRA   | AGCAACGAACAAAAGAAAAAGAAGCTCAAGGTT              |
|                                 | <i>trfA</i> -159R             | CGTGCTGAAGACTTTTGACGTT                         |
|                                 | <i>trfA</i> -70F              | AGAAGGTGAAGATCAATTAGAAGAATTATTC                |
|                                 | HU-1708 FAM-TAMRA             | CGTGAACGTGCTGCACGTAA                           |
|                                 | HU-1687 F                     | GGTTTCGGTAACTTTGAGG                            |
|                                 | HU-1747R                      | CAGTTTGAGGGTTACGACC                            |
|                                 | <i>spx</i> - 294T FAM-TAMRA   | TAAACGACTACAAGTTGGTTATAAT                      |
|                                 | <i>spx</i> - 360R             | CGTACGAACTTTCTAGGTAAGAA                        |
| <i>spx</i> - 263F               | GCTTATTACGTGCTCCAATTATTTTA    |                                                |

<sup>1</sup>Underlined regions represent restriction enzyme sequences.
